# Supplementary material for: Sorbitol Reduces Sensitivity to Alternaria by Promoting Ceramide Kinases (CERK) Expression through Transcription Factor Pswrky25 in Populus (Populus simonii Carr.)
Source: MDPI journal article supplement (doi:10.3390/genes13030405), 2022-02-24
Supplement: s1 [file s1]

# Supplementary materials

## Supplementary Figures:

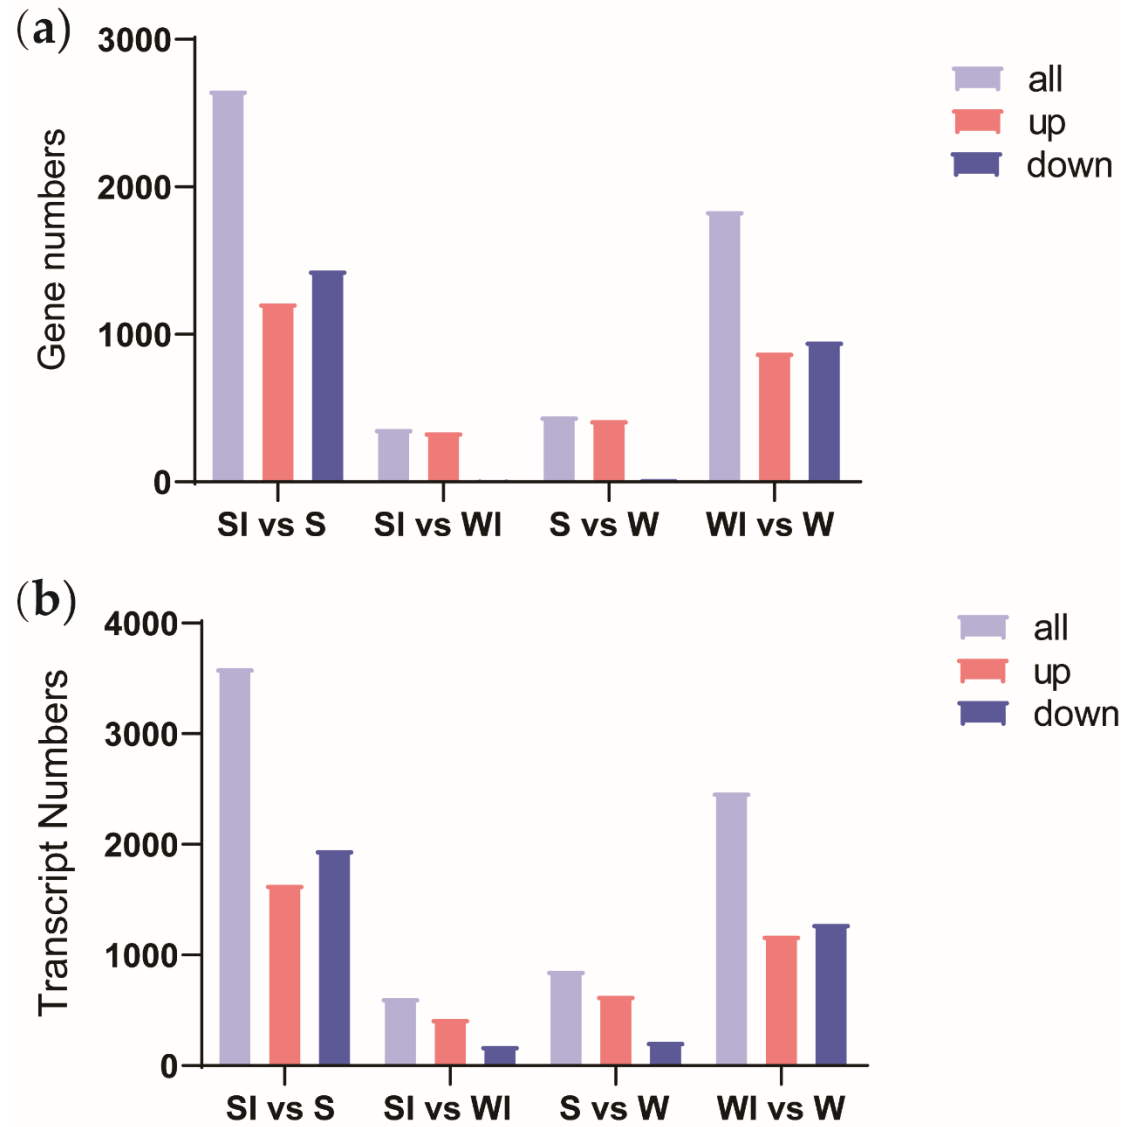

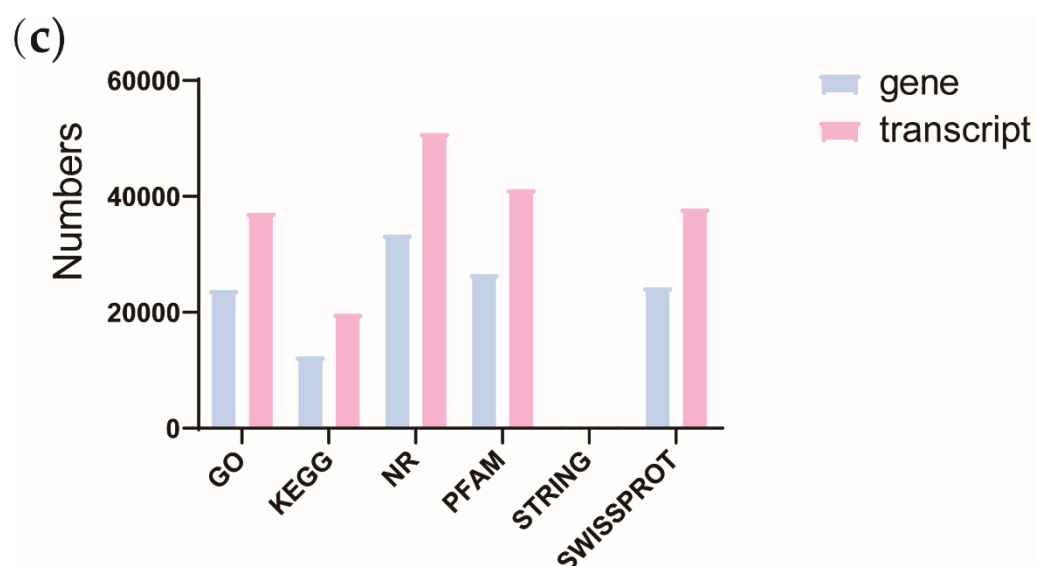

**Figure S1: Statistics of DEGs.**

(a) Statistics of all differential genes and the number of up-regulated and down-regulated differential genes in different groups. (b) Statistics of all differential transcription factors and up-regulated and down-regulated differential transcription factors in different groups. (c) Statistics of the number of differential genes in different annotation analysis. (W represents water feeding; WI represents water feeding then infestation; S represents sorbitol feeding; SI represents sorbitol feeding then infestation.).

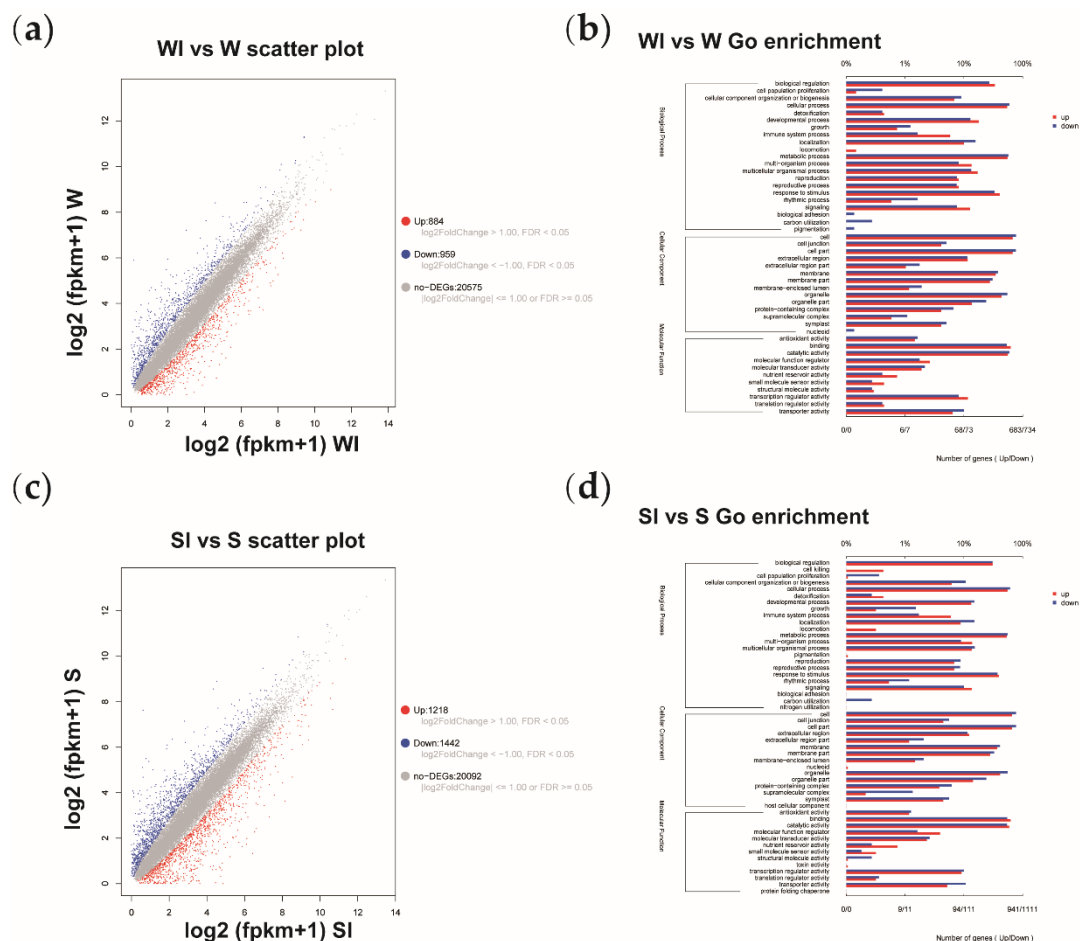

**Figure S2: GO and KEGG enrichment analysis showed that differentially expressed genes between treatments.**

(a) GO enrichment analysis of differential genes between WI and W. (b) KEGG enrichment analysis of differential genes between WI and W. (c) GO enrichment analysis of differential genes between SI and S. (d) KEGG enrichment analysis of differential gene between SI and S. (W represents water feeding; WI represents water feeding then infestation; S represents sorbitol feeding; SI represents sorbitol feeding then infestation.).

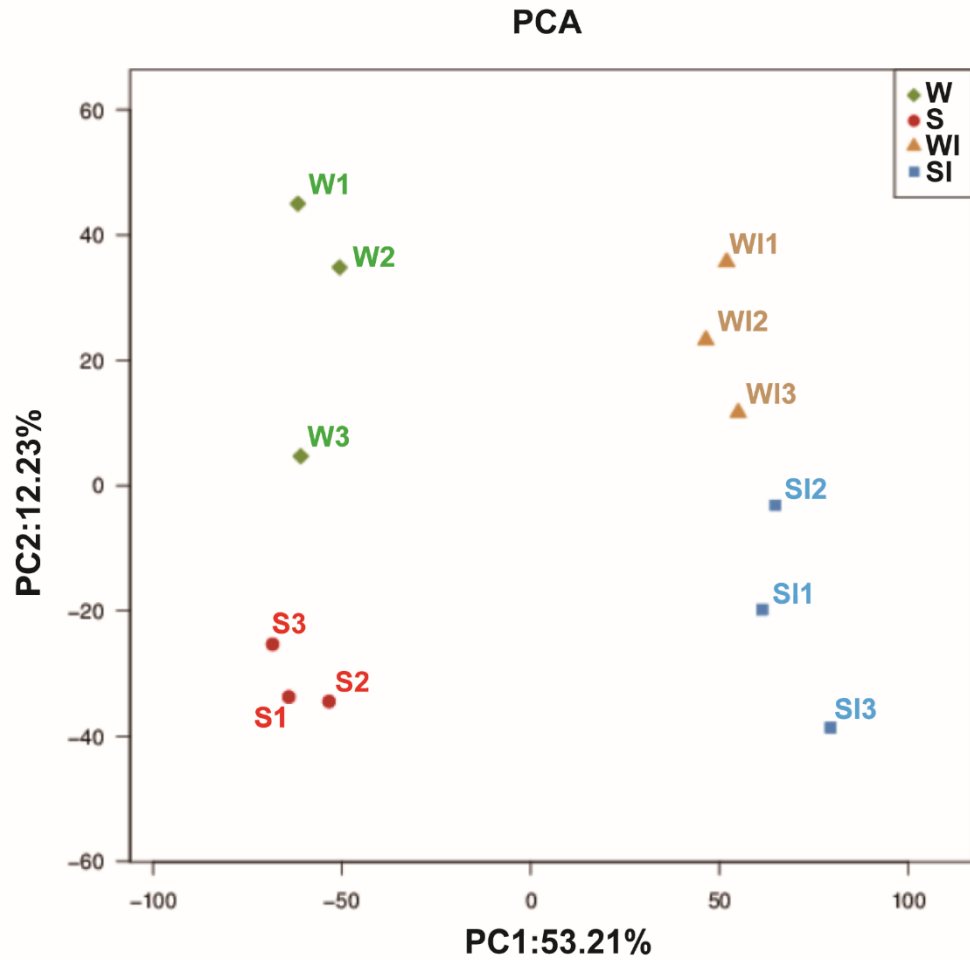

**Figure S3: PCA analysis showing intra- sample and inter- sample correlation.**

It shows the PCA analysis of 12 samples. (W represents water feeding; WI represents water feeding then infestation; S represents sorbitol feeding; SI represents sorbitol feeding then infestation. And the 1, 2, 3 represents three biological repetitions.).

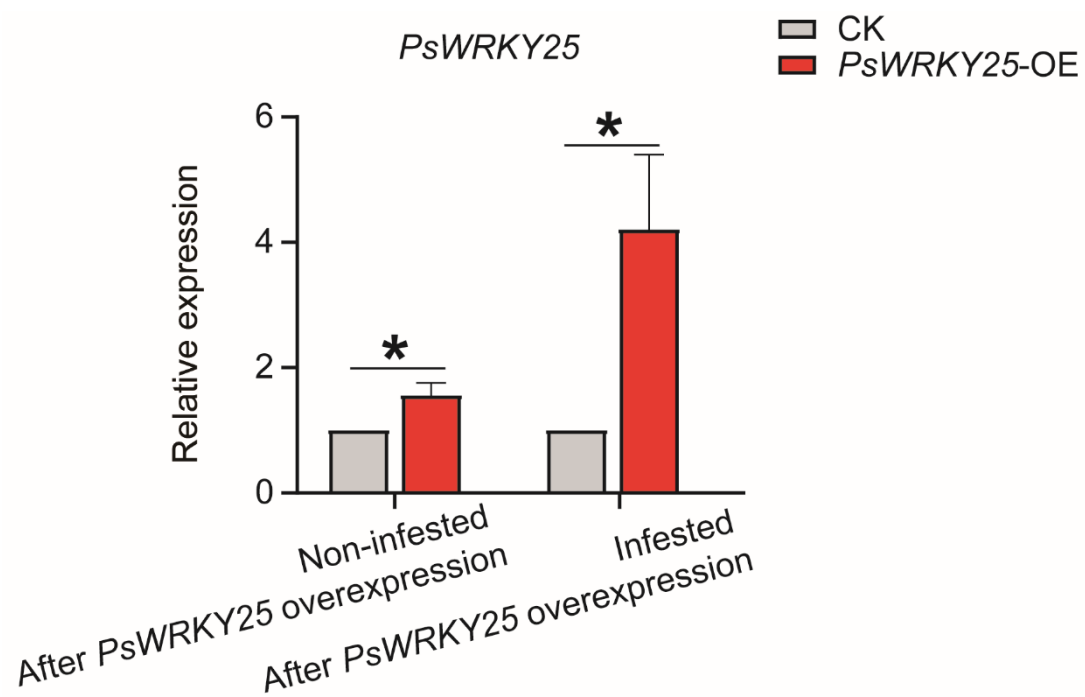

**Figure S4: The relative expression of *PsWRKY25* in different treatment periods.**

The relative expression of *PsWRKY25*. It was measured in leaves during different periods of pathogen infestation. (\* stands for  $p < 0.05$ , with significant difference.).

## Supplementary Tables:

**Table S1: Sequencing raw data statistics.**

| Sample ID | Total Reads | Total Bases | Error% | Q20%  | Q30%  | GC%   |
|-----------|-------------|-------------|--------|-------|-------|-------|
| WI3       | 43235154    | 6485273100  | 0.0284 | 96.44 | 91.37 | 45.46 |
| WI2       | 56899720    | 8534958000  | 0.0279 | 96.71 | 91.7  | 44.1  |
| WI1       | 43749624    | 6562443600  | 0.0286 | 96.33 | 91.21 | 45.73 |
| W3        | 42014688    | 6302203200  | 0.0271 | 97.06 | 92.31 | 43.99 |
| W2        | 45163140    | 6774471000  | 0.0281 | 96.64 | 91.57 | 44.09 |
| W1        | 46431786    | 6964767900  | 0.028  | 96.69 | 91.59 | 45.12 |
| SI3       | 48772064    | 7315809600  | 0.0277 | 96.77 | 91.84 | 45.37 |
| SI2       | 53449888    | 8017483200  | 0.0273 | 96.95 | 92.17 | 44.23 |
| SI1       | 48976330    | 7346449500  | 0.028  | 96.64 | 91.7  | 44.14 |
| S3        | 67144730    | 10071709500 | 0.0279 | 96.7  | 91.66 | 45.48 |
| S2        | 58828702    | 8824305300  | 0.0281 | 96.68 | 91.44 | 44.43 |
| S1        | 48403090    | 7260463500  | 0.0281 | 96.58 | 91.57 | 44.12 |

**Table S2: RT-qPCR primer sequences.**

| <b>Primer</b>              | <b>(5' to 3')</b>         | <b>Base</b> |
|----------------------------|---------------------------|-------------|
| <i>UBQ</i> -qPCR-F         | AGACCTACACCAAGCCCAAGAAGAT | 25          |
| <i>UBQ</i> -qPCR-R         | CCAGCACCGCACTCAGCATTAG    | 22          |
| <i>PtPR1</i> -like1-qPCR-F | TTTGGCGTAATTCTGCTCGC      | 20          |
| <i>PtPR1</i> -like1-qPCR-R | TGCCGGGTGGATCATAGTTG      | 20          |
| <i>PtPR1</i> -like2-qPCR-F | CCACTAACCTGGGACACCAC      | 20          |
| <i>PtPR1</i> -like2-qPCR-R | CCATGCAAGGTTCTCCCCAT      | 20          |
| <i>PtCML</i> -qPCR-F       | CGGGTGACTGGTCCGATATG      | 20          |
| <i>PtCML</i> -qPCR-R       | TTTCTCGAGACAAGGCCGTC      | 20          |
| <i>PtCPK</i> -qPCR-F       | ACTTGTCAAGGCAGCCAAAT      | 20          |
| <i>PtCPK</i> -qPCR-R       | CCCCTGCACAAAGCTCCATA      | 20          |
| <i>PtCPK26</i> -qPCR-F     | CCTCCAATTCCAAGCGCAAC      | 20          |
| <i>PtCPK26</i> -qPCR-R     | GCTGTCCTTCTTCGGGTTGA      | 20          |
| <i>PtCEPK1</i> -qPCR-F     | TACTCAGGAGTTGCTGCAGC      | 20          |
| <i>PtCEPK1</i> -qPCR-R     | CTTCAAGGGCCGGTAGCTAC      | 20          |
| <i>PtWRKY25</i> -qPCR-F    | ACCACAGCAACAATGGCAAC      | 20          |
| <i>PtWRKY25</i> -qPCR-R    | CGGATGTTGCTGTAGGTGGT      | 20          |
| <i>PtWRKY33</i> -qPCR-F    | GGACAACCTTAGCTGGGGAC      | 20          |
| <i>PtWRKY33</i> -qPCR-R    | GGGGGAGGAGAAAAGGGTTG      | 20          |

**Table S3: Vector primer sequences.**

| Primer            | (5' to 3')             | Base |
|-------------------|------------------------|------|
| <i>PtWRKY25-F</i> | ATGGCTGCTTCTTCAGGGAG   | 20   |
| <i>PtWRKY25-R</i> | CTACCAAAACTCTCTACTTCCA | 23   |

**Table S4: GO enrichment data.**

Due to the large amount of data, please see the "Supplementary Table ".

**Table S5: KEGG enrichment data.**

Due to the large amount of data, please see the "Supplementary Table ".

**Table S6: Venn data.**

Due to the large amount of data, please see the "Supplementary Table ".

**Table S7: TF binding sites data.**

Due to the large amount of data, please see the "Supplementary Table ".

**Table S8: DEGs data.**

Due to the large amount of data, please see the "Supplementary Table ".
